# Supplementary material for: Long-term perturbation of the peripheral immune system months after SARS-CoV-2 infection
Source: Springer Nature journal article supplement (doi:10.1186/s12916-021-02228-6), 2022-01-13

# A Platelet activation, signaling & aggregation

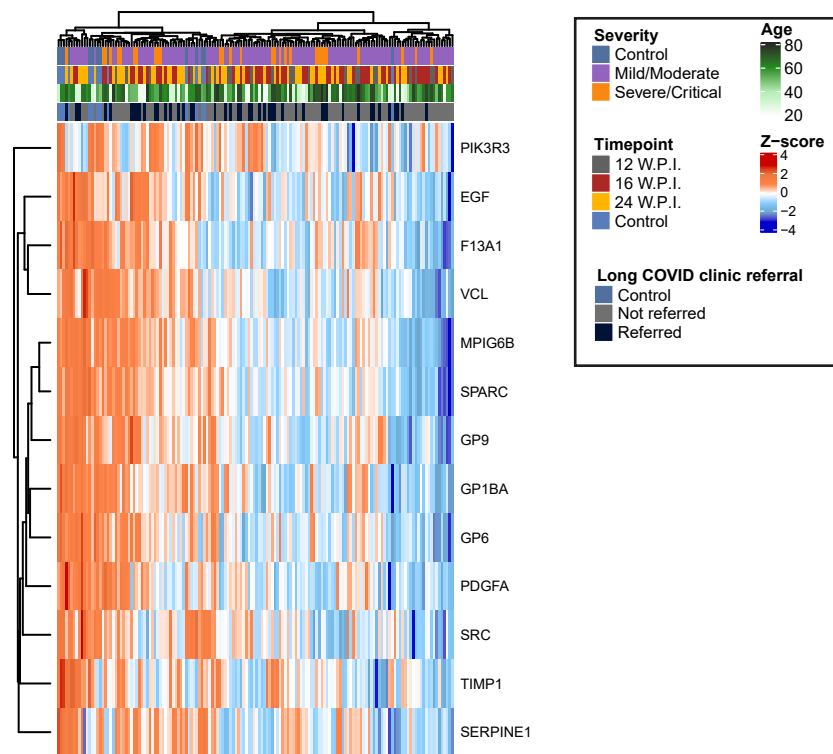

# B Oxidative phosphorylation

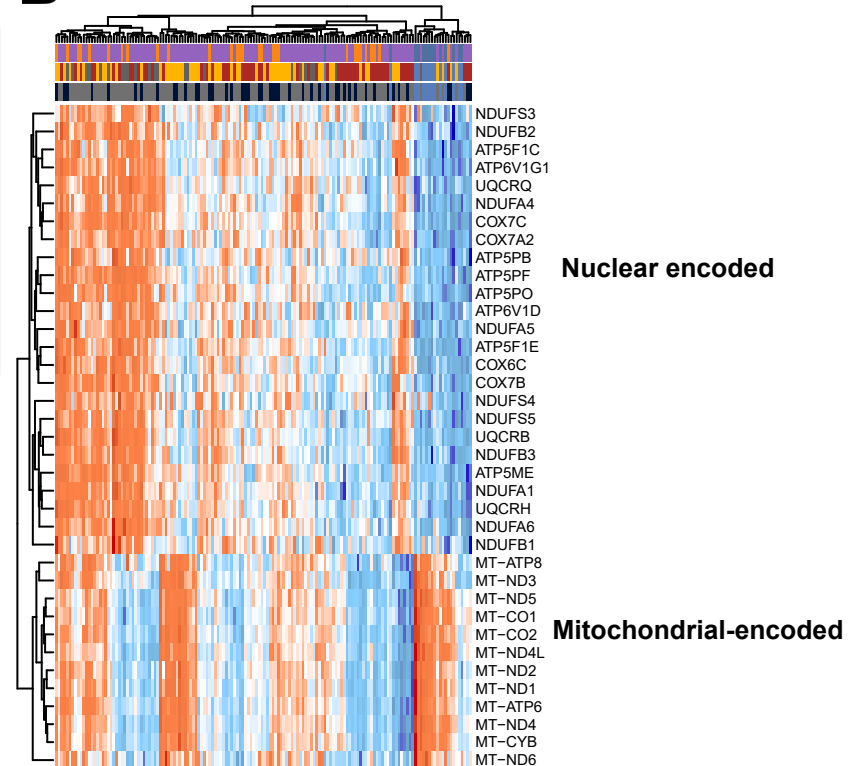

# C Serum C-Reactive Protein (CRP) titres

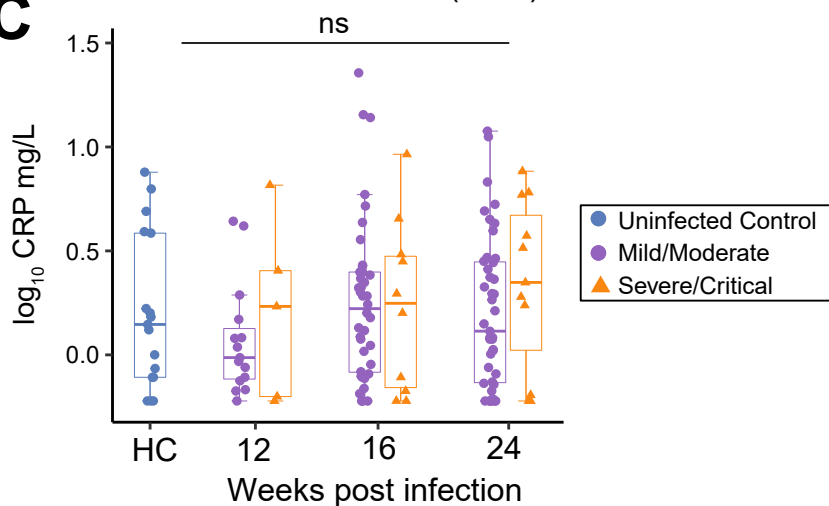

Supplement: MOESM2 [file 20033312]
