# Supplementary material for: Long-term perturbation of the peripheral immune system months after SARS-CoV-2 infection
Source: Springer Nature journal article supplement (doi:10.1186/s12916-021-02228-6), 2022-01-13
Supplement: MOESM10 [file 20033312]

## COVID-19 SA Study: Long COVID Questionnaire

|                                                                                                                                                                                                                                                                                                                                                                                                                                                                                                                                                                                                                                                                                                                                                                                                                                                                                                                                                                                                                                                                                                                                                                   |                                                                                                                                                                                                                                                                  |                                                                                                                                                                                                                                                                                                                                                                 |                                                                                                                                                                                                                                                                                                                                                                                                                                                                                                          |
|-------------------------------------------------------------------------------------------------------------------------------------------------------------------------------------------------------------------------------------------------------------------------------------------------------------------------------------------------------------------------------------------------------------------------------------------------------------------------------------------------------------------------------------------------------------------------------------------------------------------------------------------------------------------------------------------------------------------------------------------------------------------------------------------------------------------------------------------------------------------------------------------------------------------------------------------------------------------------------------------------------------------------------------------------------------------------------------------------------------------------------------------------------------------|------------------------------------------------------------------------------------------------------------------------------------------------------------------------------------------------------------------------------------------------------------------|-----------------------------------------------------------------------------------------------------------------------------------------------------------------------------------------------------------------------------------------------------------------------------------------------------------------------------------------------------------------|----------------------------------------------------------------------------------------------------------------------------------------------------------------------------------------------------------------------------------------------------------------------------------------------------------------------------------------------------------------------------------------------------------------------------------------------------------------------------------------------------------|
| <i>Date</i>                                                                                                                                                                                                                                                                                                                                                                                                                                                                                                                                                                                                                                                                                                                                                                                                                                                                                                                                                                                                                                                                                                                                                       | <i>Site Number</i>                                                                                                                                                                                                                                               | <i>Study Number</i>                                                                                                                                                                                                                                                                                                                                             | <i>Patient Initials</i>                                                                                                                                                                                                                                                                                                                                                                                                                                                                                  |
| <div style="display: flex; justify-content: space-around;"> <div style="border: 1px solid black; width: 20px; height: 20px; display: inline-block;"></div> <div style="border: 1px solid black; width: 20px; height: 20px; display: inline-block;"></div> </div> / <div style="display: flex; justify-content: space-around; margin-left: 10px;"> <div style="border: 1px solid black; width: 20px; height: 20px; display: inline-block;"></div> <div style="border: 1px solid black; width: 20px; height: 20px; display: inline-block;"></div> <div style="border: 1px solid black; width: 20px; height: 20px; display: inline-block;"></div> </div> / <div style="display: flex; justify-content: space-around; margin-left: 10px;"> <div style="border: 1px solid black; width: 20px; height: 20px; display: inline-block;"></div> <div style="border: 1px solid black; width: 20px; height: 20px; display: inline-block;"></div> <div style="border: 1px solid black; width: 20px; height: 20px; display: inline-block;"></div> <div style="border: 1px solid black; width: 20px; height: 20px; display: inline-block;"></div> </div><br><i>(dd/mon/yyyy)</i> | <div style="display: flex; justify-content: space-around;"> <div style="border: 1px solid black; width: 20px; height: 20px; display: inline-block;"></div> <div style="border: 1px solid black; width: 20px; height: 20px; display: inline-block;"></div> </div> | <div style="display: flex; justify-content: space-around;"> <div style="border: 1px solid black; width: 20px; height: 20px; display: inline-block;"></div> <div style="border: 1px solid black; width: 20px; height: 20px; display: inline-block;"></div> <div style="border: 1px solid black; width: 20px; height: 20px; display: inline-block;"></div> </div> | <div style="display: flex; justify-content: space-around;"> <div style="border: 1px solid black; width: 20px; height: 20px; display: inline-block;"></div> <div style="border: 1px solid black; width: 20px; height: 20px; display: inline-block;"></div> <div style="border: 1px solid black; width: 20px; height: 20px; display: inline-block;"></div> <div style="border: 1px solid black; width: 20px; height: 20px; display: inline-block;"></div> </div><br><i>E.g. SMITH, John</i><br><i>SMJO</i> |

1. Do you have any ongoing discomfort since you were discharged from hospital/released from isolation following COVID-19 infection? If yes, please specify

2. How would you describe your current health status?

- Same as prior to COVID-19
- Often feel fatigued, and tire more easily after activity now than prior to COVID-19
- Better health status than prior to COVID-19

3. Have you experienced any of the following pain symptoms that appeared post COVID-19 and are persistent?

- No pain
- Headache
- Myalgia (muscle ache)
- Chest pain
- Joint pain (if yes, please fill in the table below)
- Any other if yes, please specify \_\_\_\_\_

| Joints                             | <i>Hand</i> | <i>Foot</i> | <i>Wrist</i> | <i>Ankle</i> | <i>Jaw</i> | <i>Elbow</i> | <i>Shoulder</i> | <i>Neck</i> | <i>Hip</i> | <i>Knee</i> |
|------------------------------------|-------------|-------------|--------------|--------------|------------|--------------|-----------------|-------------|------------|-------------|
| <i>Tenderness</i>                  |             |             |              |              |            |              |                 |             |            |             |
| <i>Swollen</i>                     |             |             |              |              |            |              |                 |             |            |             |
| <i>Numerical pain scale (0-10)</i> |             |             |              |              |            |              |                 |             |            |             |



0 **No pain** 10 **Intolerable pain**

4. Do you have any of the following symptoms that are new following COVID-19 infection and still present?

- None
- Sore throat
- Difficulty swallowing

| <b>Date</b>                                                                                                                                                                                                                                                                                                                                                                                                                                                                                                                                                                                                                                                                                                                                                                                                                                                                                                                                        | <b>Site Number</b>                                                                                                                                                                                                 | <b>Study Number</b>                                                                                                                                                                                                                                                                        | <b>Patient Initials</b>                                                                                                                                                                                                                                                                                                                                                                                |
|----------------------------------------------------------------------------------------------------------------------------------------------------------------------------------------------------------------------------------------------------------------------------------------------------------------------------------------------------------------------------------------------------------------------------------------------------------------------------------------------------------------------------------------------------------------------------------------------------------------------------------------------------------------------------------------------------------------------------------------------------------------------------------------------------------------------------------------------------------------------------------------------------------------------------------------------------|--------------------------------------------------------------------------------------------------------------------------------------------------------------------------------------------------------------------|--------------------------------------------------------------------------------------------------------------------------------------------------------------------------------------------------------------------------------------------------------------------------------------------|--------------------------------------------------------------------------------------------------------------------------------------------------------------------------------------------------------------------------------------------------------------------------------------------------------------------------------------------------------------------------------------------------------|
| <div style="display: flex; justify-content: space-around;"> <div style="border: 1px solid black; width: 20px; height: 20px;"></div> <div style="border: 1px solid black; width: 20px; height: 20px;"></div> </div> / <div style="display: flex; justify-content: space-around; margin-left: 10px;"> <div style="border: 1px solid black; width: 20px; height: 20px;"></div> <div style="border: 1px solid black; width: 20px; height: 20px;"></div> <div style="border: 1px solid black; width: 20px; height: 20px;"></div> </div> / <div style="display: flex; justify-content: space-around; margin-left: 10px;"> <div style="border: 1px solid black; width: 20px; height: 20px;"></div> <div style="border: 1px solid black; width: 20px; height: 20px;"></div> <div style="border: 1px solid black; width: 20px; height: 20px;"></div> <div style="border: 1px solid black; width: 20px; height: 20px;"></div> </div><br><i>(dd/mon/yyyy)</i> | <div style="display: flex; justify-content: space-around;"> <div style="border: 1px solid black; width: 20px; height: 20px;"></div> <div style="border: 1px solid black; width: 20px; height: 20px;"></div> </div> | <div style="display: flex; justify-content: space-around;"> <div style="border: 1px solid black; width: 20px; height: 20px;"></div> <div style="border: 1px solid black; width: 20px; height: 20px;"></div> <div style="border: 1px solid black; width: 20px; height: 20px;"></div> </div> | <div style="display: flex; justify-content: space-around;"> <div style="border: 1px solid black; width: 20px; height: 20px;"></div> <div style="border: 1px solid black; width: 20px; height: 20px;"></div> <div style="border: 1px solid black; width: 20px; height: 20px;"></div> <div style="border: 1px solid black; width: 20px; height: 20px;"></div> </div><br><i>E.g. SMITH, John<br/>SMJO</i> |

5. Do you have any of the following symptoms that were not present before COVID-19 infection but are present now?

- None
- Low grade fever (37.3-38.0°C)
- Palpitations
- Dizziness
- Nasal congestion
- Skin rash

6. Are you more prone to experience the following symptoms since recovering from COVID-19 infection?

- None
- Diarrhoea
- Nausea
- Vomiting

7. How do you feel about your sense of smell now as compared to prior to COVID-19 infection?

- Same as before
- Worse than before
- Better than before
- Total loss

8. How do you feel about your sense of taste now as compared to prior to COVID-19 infection?

- Same as before
- Worse than before
- Better than before
- Total loss

9. How do you feel about your appetite now as compared to prior to COVID-19 infection?

- Same as before
- Worse than before
- Better than before

10. What do you think about your sleeping now as compared to prior to COVID-19?

- Same as before
- Worse than before
- Better than before

11. How do you feel about your muscle strength now as compared with the status prior to COVID-19?

- Same as before
- Worse than before
- Better than before

| <b>Date</b>                                                                                                                                                                                                                                                                                                                                                                                                                                                                                                                                                                                                                                                                                                                                                                                                                                                                                                                                        | <b>Site Number</b>                                                                                                                                                                                                 | <b>Study Number</b>                                                                                                                                                                                                                                                                        | <b>Patient Initials</b>                                                                                                                                                                                                                                                                                                                                                                                |
|----------------------------------------------------------------------------------------------------------------------------------------------------------------------------------------------------------------------------------------------------------------------------------------------------------------------------------------------------------------------------------------------------------------------------------------------------------------------------------------------------------------------------------------------------------------------------------------------------------------------------------------------------------------------------------------------------------------------------------------------------------------------------------------------------------------------------------------------------------------------------------------------------------------------------------------------------|--------------------------------------------------------------------------------------------------------------------------------------------------------------------------------------------------------------------|--------------------------------------------------------------------------------------------------------------------------------------------------------------------------------------------------------------------------------------------------------------------------------------------|--------------------------------------------------------------------------------------------------------------------------------------------------------------------------------------------------------------------------------------------------------------------------------------------------------------------------------------------------------------------------------------------------------|
| <div style="display: flex; justify-content: space-around;"> <div style="border: 1px solid black; width: 20px; height: 20px;"></div> <div style="border: 1px solid black; width: 20px; height: 20px;"></div> </div> / <div style="display: flex; justify-content: space-around; margin-left: 10px;"> <div style="border: 1px solid black; width: 20px; height: 20px;"></div> <div style="border: 1px solid black; width: 20px; height: 20px;"></div> <div style="border: 1px solid black; width: 20px; height: 20px;"></div> </div> / <div style="display: flex; justify-content: space-around; margin-left: 10px;"> <div style="border: 1px solid black; width: 20px; height: 20px;"></div> <div style="border: 1px solid black; width: 20px; height: 20px;"></div> <div style="border: 1px solid black; width: 20px; height: 20px;"></div> <div style="border: 1px solid black; width: 20px; height: 20px;"></div> </div><br><i>(dd/mon/yyyy)</i> | <div style="display: flex; justify-content: space-around;"> <div style="border: 1px solid black; width: 20px; height: 20px;"></div> <div style="border: 1px solid black; width: 20px; height: 20px;"></div> </div> | <div style="display: flex; justify-content: space-around;"> <div style="border: 1px solid black; width: 20px; height: 20px;"></div> <div style="border: 1px solid black; width: 20px; height: 20px;"></div> <div style="border: 1px solid black; width: 20px; height: 20px;"></div> </div> | <div style="display: flex; justify-content: space-around;"> <div style="border: 1px solid black; width: 20px; height: 20px;"></div> <div style="border: 1px solid black; width: 20px; height: 20px;"></div> <div style="border: 1px solid black; width: 20px; height: 20px;"></div> <div style="border: 1px solid black; width: 20px; height: 20px;"></div> </div><br><i>E.g. SMITH, John<br/>SMJO</i> |

12. How do you experience hair loss now as compared with prior to COVID-19?

- No hair loss before or after COVID-19
- Hair loss is same as before
- Lose more hair now than before
- Lose less hair now than before

13. How do you feel about your memory and concentration now as compared with prior to COVID-19?

- Same as before
- Worse than before
- Better than before

**Assess your health status TODAY and BEFORE COVID-19**

*Under each heading please tick the ONE box that best describes your health TODAY and IMMEDIATELY PRIOR TO BEING DIAGNOSED WITH COVID-19.*

***MOBILITY***

**TODAY**

- I have no problems in walking about
- I have slight problems in walking about
- I have moderate problems in walking about
- I have severe problems in walking about
- I am unable to walk about

**BEFORE COVID-19**

- I had no problems in walking about
- I had slight problems in walking about
- I had moderate problems in walking about
- I had severe problems in walking about
- I was unable to walk about

***SELF-CARE***

**TODAY**

- I have no problems with washing or dressing myself
- I have slight problems with washing or dressing myself
- I have moderate problems with washing or dressing myself
- I have severe problems with washing or dressing myself
- I am unable to wash or dress myself

**BEFORE COVID-19**

- I had no problems with washing or dressing myself
- I had slight problems with washing or dressing myself
- I had moderate problems with washing or dressing myself
- I had severe problems with washing or dressing myself
- I was unable to wash or dress myself

| <b>Date</b>                                                                                                                                                                                                                                                                                                                                                                                                                                                                                                                                                                                                                                                                                                                                                                                                                                                                                                                                                                                                                                                                                                                                                                                                                                                                            | <b>Site Number</b>                                                                                                                                                                                                                                               | <b>Study Number</b>                                                                                                                                                                                                                                                                                                                                             | <b>Patient Initials</b>                                                                                                                                                                                                                                                                                                                                                                                                                                                                                                                             |
|----------------------------------------------------------------------------------------------------------------------------------------------------------------------------------------------------------------------------------------------------------------------------------------------------------------------------------------------------------------------------------------------------------------------------------------------------------------------------------------------------------------------------------------------------------------------------------------------------------------------------------------------------------------------------------------------------------------------------------------------------------------------------------------------------------------------------------------------------------------------------------------------------------------------------------------------------------------------------------------------------------------------------------------------------------------------------------------------------------------------------------------------------------------------------------------------------------------------------------------------------------------------------------------|------------------------------------------------------------------------------------------------------------------------------------------------------------------------------------------------------------------------------------------------------------------|-----------------------------------------------------------------------------------------------------------------------------------------------------------------------------------------------------------------------------------------------------------------------------------------------------------------------------------------------------------------|-----------------------------------------------------------------------------------------------------------------------------------------------------------------------------------------------------------------------------------------------------------------------------------------------------------------------------------------------------------------------------------------------------------------------------------------------------------------------------------------------------------------------------------------------------|
| <div style="display: flex; justify-content: space-around;"> <div style="border: 1px solid black; width: 20px; height: 20px; display: inline-block;"></div> <div style="border: 1px solid black; width: 20px; height: 20px; display: inline-block;"></div> </div> <span style="font-size: 20px; margin: 0 5px;">/</span> <div style="display: flex; justify-content: space-around;"> <div style="border: 1px solid black; width: 20px; height: 20px; display: inline-block;"></div> <div style="border: 1px solid black; width: 20px; height: 20px; display: inline-block;"></div> <div style="border: 1px solid black; width: 20px; height: 20px; display: inline-block;"></div> </div> <span style="font-size: 20px; margin: 0 5px;">/</span> <div style="display: flex; justify-content: space-around;"> <div style="border: 1px solid black; width: 20px; height: 20px; display: inline-block;"></div> <div style="border: 1px solid black; width: 20px; height: 20px; display: inline-block;"></div> <div style="border: 1px solid black; width: 20px; height: 20px; display: inline-block;"></div> <div style="border: 1px solid black; width: 20px; height: 20px; display: inline-block;"></div> </div> <p style="text-align: center; margin-top: 5px;"><i>(dd/mon/yyyy)</i></p> | <div style="display: flex; justify-content: space-around;"> <div style="border: 1px solid black; width: 20px; height: 20px; display: inline-block;"></div> <div style="border: 1px solid black; width: 20px; height: 20px; display: inline-block;"></div> </div> | <div style="display: flex; justify-content: space-around;"> <div style="border: 1px solid black; width: 20px; height: 20px; display: inline-block;"></div> <div style="border: 1px solid black; width: 20px; height: 20px; display: inline-block;"></div> <div style="border: 1px solid black; width: 20px; height: 20px; display: inline-block;"></div> </div> | <div style="display: flex; justify-content: space-around;"> <div style="border: 1px solid black; width: 20px; height: 20px; display: inline-block;"></div> <div style="border: 1px solid black; width: 20px; height: 20px; display: inline-block;"></div> <div style="border: 1px solid black; width: 20px; height: 20px; display: inline-block;"></div> <div style="border: 1px solid black; width: 20px; height: 20px; display: inline-block;"></div> </div> <p style="text-align: center; margin-top: 5px;"><i>E.g. SMITH, John<br/>SMJO</i></p> |

***USUAL ACTIVITIES*** (e.g. work, study, housework, family or leisure activities)

TODAY

- I have no problems doing my usual activities
- I have slight problems doing my usual activities
- I have moderate problems doing my usual activities
- I have severe problems doing my usual activities
- I am unable to do my usual activities

BEFORE COVID-19

- I had no problems doing my usual activities
- I had slight problems doing my usual activities
- I had moderate problems doing my usual activities
- I had severe problems doing my usual activities
- I was unable to do my usual activities

***PAIN / DISCOMFORT***

TODAY

- I have no pain or discomfort
- I have slight pain or discomfort
- I have moderate pain or discomfort
- I have severe pain or discomfort
- I have extreme pain or discomfort

BEFORE COVID-19

- I had no pain or discomfort
- I had slight pain or discomfort
- I had moderate pain or discomfort
- I had severe pain or discomfort
- I had extreme pain or discomfort

***ANXIETY / DEPRESSION***

TODAY

- I am not anxious or depressed
- I am slightly anxious or depressed
- I am moderately anxious or depressed
- I am severely anxious or depressed
- I am extremely anxious or depressed

BEFORE COVID-19

- I was not anxious or depressed
- I was slightly anxious or depressed
- I was moderately anxious or depressed
- I was severely anxious or depressed
- I was extremely anxious or depressed

| <i>Date</i>                                                                                                                                                                                                                                                                                                                                                                                                                                                                                                                                                                                                                                                                                                                                                                                                                                                                                                                                        | <i>Site Number</i>                                                                                                                                                                                                 | <i>Study Number</i>                                                                                                                                                                                                                                                                        | <i>Patient Initials</i>                                                                                                                                                                                                                                                                                                                                                                                |
|----------------------------------------------------------------------------------------------------------------------------------------------------------------------------------------------------------------------------------------------------------------------------------------------------------------------------------------------------------------------------------------------------------------------------------------------------------------------------------------------------------------------------------------------------------------------------------------------------------------------------------------------------------------------------------------------------------------------------------------------------------------------------------------------------------------------------------------------------------------------------------------------------------------------------------------------------|--------------------------------------------------------------------------------------------------------------------------------------------------------------------------------------------------------------------|--------------------------------------------------------------------------------------------------------------------------------------------------------------------------------------------------------------------------------------------------------------------------------------------|--------------------------------------------------------------------------------------------------------------------------------------------------------------------------------------------------------------------------------------------------------------------------------------------------------------------------------------------------------------------------------------------------------|
| <div style="display: flex; justify-content: space-around;"> <div style="border: 1px solid black; width: 20px; height: 20px;"></div> <div style="border: 1px solid black; width: 20px; height: 20px;"></div> </div> / <div style="display: flex; justify-content: space-around; margin-left: 10px;"> <div style="border: 1px solid black; width: 20px; height: 20px;"></div> <div style="border: 1px solid black; width: 20px; height: 20px;"></div> <div style="border: 1px solid black; width: 20px; height: 20px;"></div> </div> / <div style="display: flex; justify-content: space-around; margin-left: 10px;"> <div style="border: 1px solid black; width: 20px; height: 20px;"></div> <div style="border: 1px solid black; width: 20px; height: 20px;"></div> <div style="border: 1px solid black; width: 20px; height: 20px;"></div> <div style="border: 1px solid black; width: 20px; height: 20px;"></div> </div><br><i>(dd/mon/yyyy)</i> | <div style="display: flex; justify-content: space-around;"> <div style="border: 1px solid black; width: 20px; height: 20px;"></div> <div style="border: 1px solid black; width: 20px; height: 20px;"></div> </div> | <div style="display: flex; justify-content: space-around;"> <div style="border: 1px solid black; width: 20px; height: 20px;"></div> <div style="border: 1px solid black; width: 20px; height: 20px;"></div> <div style="border: 1px solid black; width: 20px; height: 20px;"></div> </div> | <div style="display: flex; justify-content: space-around;"> <div style="border: 1px solid black; width: 20px; height: 20px;"></div> <div style="border: 1px solid black; width: 20px; height: 20px;"></div> <div style="border: 1px solid black; width: 20px; height: 20px;"></div> <div style="border: 1px solid black; width: 20px; height: 20px;"></div> </div><br><i>E.g. SMITH, John<br/>SMJO</i> |

The best health you can imagine

- We would like to know how good or bad your health is **TODAY**.
- This scale is numbered from 0 to 100.
- 100 means the best health you can imagine.  
0 means the worst health you can imagine.
- Mark an X on the scale to indicate how your health is **TODAY**.
- Now, please write the number you marked on the scale in the box below

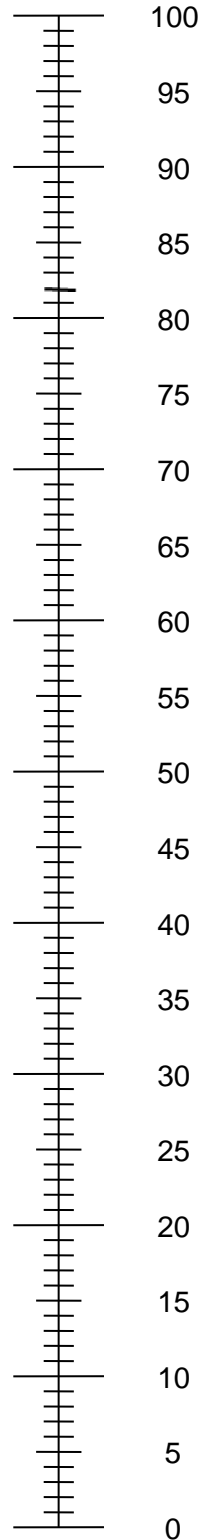

The worst health you can imagine

| <i>Date</i>                                                                                                                                                                                                                                                                                                                                                                                                                                                                                                                                                                                                                                                                                                                                                                                                                                          | <i>Site Number</i>                                                                                                                              | <i>Study Number</i>                                                                                                                                                                                                     | <i>Patient Initials</i>                                                                                                                                                                                                                                                                                                             |
|------------------------------------------------------------------------------------------------------------------------------------------------------------------------------------------------------------------------------------------------------------------------------------------------------------------------------------------------------------------------------------------------------------------------------------------------------------------------------------------------------------------------------------------------------------------------------------------------------------------------------------------------------------------------------------------------------------------------------------------------------------------------------------------------------------------------------------------------------|-------------------------------------------------------------------------------------------------------------------------------------------------|-------------------------------------------------------------------------------------------------------------------------------------------------------------------------------------------------------------------------|-------------------------------------------------------------------------------------------------------------------------------------------------------------------------------------------------------------------------------------------------------------------------------------------------------------------------------------|
| <div style="display: flex; justify-content: space-around;"> <div style="border: 1px solid black; width: 20px; height: 20px;"></div> <div style="border: 1px solid black; width: 20px; height: 20px;"></div> </div> / <div style="display: flex; justify-content: space-around; margin: 0 10px;"> <div style="border: 1px solid black; width: 20px; height: 20px;"></div> <div style="border: 1px solid black; width: 20px; height: 20px;"></div> </div> / <div style="display: flex; justify-content: space-around;"> <div style="border: 1px solid black; width: 20px; height: 20px;"></div> <div style="border: 1px solid black; width: 20px; height: 20px;"></div> <div style="border: 1px solid black; width: 20px; height: 20px;"></div> <div style="border: 1px solid black; width: 20px; height: 20px;"></div> </div><br><i>(dd/mon/yyyy)</i> | <div style="border: 1px solid black; width: 20px; height: 20px;"></div> <div style="border: 1px solid black; width: 20px; height: 20px;"></div> | <div style="border: 1px solid black; width: 20px; height: 20px;"></div> <div style="border: 1px solid black; width: 20px; height: 20px;"></div> <div style="border: 1px solid black; width: 20px; height: 20px;"></div> | <div style="border: 1px solid black; width: 20px; height: 20px;"></div> <div style="border: 1px solid black; width: 20px; height: 20px;"></div> <div style="border: 1px solid black; width: 20px; height: 20px;"></div> <div style="border: 1px solid black; width: 20px; height: 20px;"></div><br><i>E.g. SMITH, John<br/>SMJO</i> |

The best health you can imagine

- We would like to know how good or bad your health **WAS IMMEDIATELY PRIOR TO BEING DIAGNOSED WITH COVID-19.**
- This scale is numbered from 0 to 100.
- 100 means the best health you can imagine.  
0 means the worst health you can imagine.
- Mark an X on the scale to indicate how your health is **WAS IMMEDIATELY PRIOR TO BEING DIAGNOSED WITH COVID-19.**
- Now, please write the number you marked on the scale in the box below

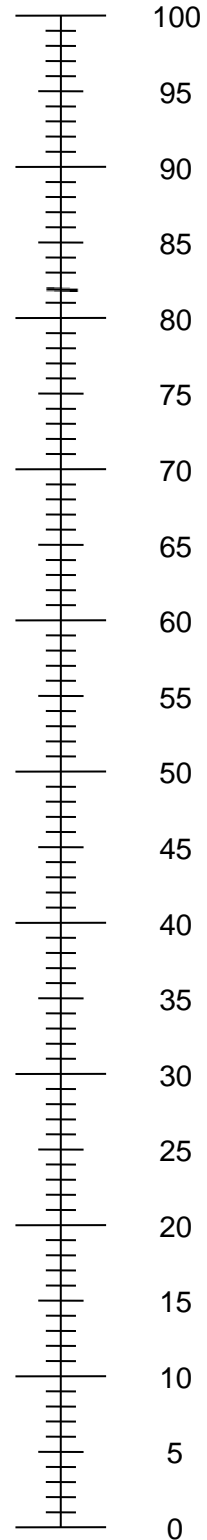

The worst health you can imagine

|                                                                                                                                                                                                                          |                                           |                                                                |                                                                                                                         |
|--------------------------------------------------------------------------------------------------------------------------------------------------------------------------------------------------------------------------|-------------------------------------------|----------------------------------------------------------------|-------------------------------------------------------------------------------------------------------------------------|
| <b>Date</b>                                                                                                                                                                                                              | <b>Site Number</b>                        | <b>Study Number</b>                                            | <b>Patient Initials</b>                                                                                                 |
| <input type="text"/> <input type="text"/> / <input type="text"/> <input type="text"/> <input type="text"/> / <input type="text"/> <input type="text"/> <input type="text"/> <input type="text"/><br><i>(dd/mon/yyyy)</i> | <input type="text"/> <input type="text"/> | <input type="text"/> <input type="text"/> <input type="text"/> | <input type="text"/> <input type="text"/> <input type="text"/> <input type="text"/><br><i>E.g. SMITH, John<br/>SMJO</i> |

Chose the phrase that best describes your breathing before and after COVID-19 according to the following table

**Box 3: Modified Medical Research Council (mMRC) Dyspnoea Scale for grading the severity of breathlessness during daily activities**

| Grade | Symptom complex                                                                                                                                             |
|-------|-------------------------------------------------------------------------------------------------------------------------------------------------------------|
| 0     | I only get breathless with strenuous exercise                                                                                                               |
| 1     | I get short of breath when hurrying on level ground or walking up a slight hill                                                                             |
| 2     | On level ground, I walk slower than people of the same age because of breathlessness, or I have to stop for breath when walking at my own pace on the level |
| 3     | I stop for breath after walking about 100 metres or after a few minutes on level ground                                                                     |
| 4     | I am too breathless to leave the house or I am breathless when dressing or undressing                                                                       |

**Before COVID-19 grade:** \_\_\_\_\_

**After COVID-19 grade:** \_\_\_\_\_
